# Supplementary material for: Evolutionary relationships among the snakelike pygopodid lizards: a review of phylogenetic studies of an enigmatic Australian adaptive radiation
Source: PeerJ. 2021 Jun 29;9:e11502. doi: 10.7717/peerj.11502 (PMC8253114; doi:10.7717/peerj.11502)
Supplement: Supplemental Information 1 — Clade support definitions: “low support” indicates that the clade was supported by a single independent tree; “medium support” means that the clade was found in a multispecies coalescent (MSC) species tree based on large numbers of genome-wide loci, or was corroborated by two independent trees but missing taxa or conflicting evidence raises uncertainty; and “high support” denotes the clade was supported by multiple independent trees, or the clade is comprised of two species that were formerly described as a single species. See also Fig. 17. [file peerj-09-11502-s001.xlsx]

## Sheet: Plan1
Clade	Clade Members	Phylogenetic Evidence	Level of Support
1	A. repens + A. clairae	supported by allozyme tree	low
2	A. haroldi + A. litorea	supported by allozyme tree	low
3	A. repens + A. clairae + A. haroldi + A. litorea	supported by allozyme tree	low
4	A. repens + A. clairae + A. haroldi + A. litorea + A. smithi	supported by allozyme tree (A. repens and A. smithi were sister species in allozyme, mtDNA, and UCE trees, but A. clairae, A. haroldi, and A. litorea were not sampled)	low
5	A. rostrata + A. wicherina	supported by allozyme tree	low
6	A. repens + A. clairae + A. haroldi + A. litorea + A. smith + A. rostrata + A. wicherina	supported by allozyme tree	low
7	A. repens group (above seven species + A. picturata)	corroborated by allozyme, mtDNA, and UCE trees but incomplete taxon sampling and one possible ancient mitochondrial introgression event raises uncertainty	medium
8	A. repens group + A. pulchella	corroborated by mtDNA and UCE trees but both trees missing half of A. repens group and UCE trees missing most southeastern species	medium
9	A. parapulchella + A. pseudopulchella	corroborated by 2 independent trees based on morphological characters and mtDNA	high
10	A. parapulchella + A. pseudopulchella + A. striolata	corroborated by 2 independent trees based on morphological characters and mtDNA	high
11	A. parapulchella + A. pseudopulchella + A. striolata + A. inaurita	supported by mtDNA tree	low
12	A. parapulchella + A. pseudopulchella + A. striolata + A. inaurita + A. aurita	supported by mtDNA tree	low
13	Aprasia (all species)	corroborated by 4 independent trees based on morphological characters, mtDNA, nDNA (1 nuclear gene), and nDNA (4,268 UCE loci)	high
14	P. schraderi + P. steelescotti	corroborated by 2 independent trees based on allozyme loci and nDNA (4,268 UCE loci)	high
15	P. schraderi + P. steelescotti + P. nigriceps	corroborated by 2 independent trees based on allozyme loci and nDNA (4,268 UCE loci)	high
16	P. lepidopodus + P. robertsi	supported only by mtDNA tree, but these species must be sister species	high
17	Pygopus (P. schraderi + P. steelescotti + P. nigriceps + P. lepidopodus + P. robertsi)	corroborated by 5 independent trees based on morphological characters, mtDNA, nDNA (1 nuclear gene), nDNA (4 nuclear genes), and nDNA (4,268 UCE loci)	high
18	Pygopus + Paradelma	corroborated by 5 independent trees based on morphological characters, mtDNA, nDNA (1 nuclear gene), nDNA (4 nuclear genes), and nDNA (4,268 UCE loci)	high
19	Pygopus + Paradelma + Ophidiocephalus	supported by mtDNA and concatenated mtDNA + nDNA (2 nuclear genes) trees	low
20	Lialis (L. burtonis + L. jicari)	corroborated by 4 independent trees based on morphological characters, mtDNA, nDNA (1 nuclear gene), and nDNA (4,268 UCE loci)	high
21	Pygopus + Paradelma + Ophidiocephalus + Lialis	supported by mtDNA and concatenated mtDNA + nDNA (2 nuclear genes) trees	low
22	Pletholax (P. gracilis + P. edelensis)	supported only by concatenated mtDNA + nDNA (2 genes) tree, but these species must be sister species	high
23	Pygopus + Paradelma + Ophidiocephalus + Lialis + Pletholax	supported by concatenated mtDNA + nDNA (2 nuclear genes) tree	low
24	Aprasia + Pygopus + Paradelma + Ophidiocephalus + Lialis + Pletholax	corroborated by 4 independent trees based on mtDNA, nDNA (1 nuclear gene), nDNA (4 nuclear genes), and nDNA (4,268 UCE loci)	high
25	D. borea + D. tincta	supported by nDNA tree (4,268 UCE loci), but two other independent much smaller datasets (mtDNA and nDNA [4 nuclear genes]) support alterntive topologies	medium
26	D. desmosa + D. pax	corroborated by 4 independent trees based on allozyme loci, mtDNA, nDNA (4 nuclear genes), and nDNA (4,268 UCE loci)	high
27	D. desmosa + D. pax + D. tealei	supported by nDNA tree (4,268 UCE loci), but two other independent much smaller datasets (mtDNA and nDNA [4 nuclear genes]) support alterntive topologies	medium
28	D. tincta group (D. borea + D. tincta + D. desmosa + D. pax + D. tealei)	corroborated by 4 independent trees based on allozyme loci, mtDNA, nDNA (4 nuclear genes), and nDNA (4,268 UCE loci)	high
29	Clade D (D. tincta group + D. elegans)	corroborated by 2 independent trees based on mtDNA and nDNA (4 nuclear genes)	high
30	Clade D + D. labialis	supported by nDNA tree (4 nuclear loci)	low
31	D. impar + D. molleri	corroborated by 3 independent trees based on morphological characters, mtDNA, and nDNA (4 nuclear genes)	high
32	Group C2 (D. impar + D. molleri + D. plebeia)	supported by nDNA tree (4 nuclear genes); mtDNA tree corroborates this clade except that D. mitella is in this mtDNA clade (past introgression?)	medium
33	Group C2 + Clade D + D. labialis	corroborated by 2 independent nDNA trees (4 nuclear genes and 4,268 UCE loci) but inclusion of D. labialis is questionable	medium
34	D. fraseri + D. petersoni	corroborated by 2 independent trees based on nDNA (4 nuclear genes) and nDNA (4,268 UCE loci)	high
35	D. butleri + D. haroldi	corroborated by 4 independent trees based on mtDNA, nDNA (1 nuclear gene), nDNA (4 nuclear genes), and nDNA (4,268 UCE loci)	high
36	D. butleri + D. haroldi + D. grayii	supported by nDNA tree (4 nuclear genes). UCE trees are consistent but do not corroborate this. MtDNA trees show alternative place for D. grayii (past introgression?)	medium
37	D. butleri + D. haroldi + D. grayii + D. inornata	supported by nDNA tree (4 nuclear genes). UCE trees are consistent but do not corroborate this. MtDNA trees show alternative place for D. grayii (past introgression?)	medium
38	D. butleri + D. haroldi + D. grayii + D. inornata + D. nasuta	supported by nDNA tree (4 nuclear genes). UCE trees are consistent but do not corroborate this. MtDNA trees show alternative place for D. grayii (past introgression?)	medium
39	Clade B2 (D. fraseri + D. petersoni + D. butleri + D. haroldi + D. grayii + D. inornata + D. nasuta)	corroborated by mtDNA and nDNA (4,268 UCE loci) trees except D. inornata is missing from UCE trees	medium
40	Clade B2 + Group C2 + Clade D + D. labialis	corroborated by 3 nDNA trees (1 nuclear gene, 4 nuclear genes, and 4,268 UCE loci) but inclusion of D. labialis is questionable and D. inornata is missing from UCE trees	medium
41	Clade B2 + Group C2 + Clade D + D. labialis + D. mitella	corroborated by 2 independent nDNA trees (1 nuclear gene and 4 nuclear genes) but inclusion of D. labialis is questionable and D. inornata is missing from UCE trees	medium
42	D. torquata + D. australis	corroborated by 3 independent trees based on mtDNA, nDNA (1 nuclear gene), and nDNA (4 nuclear genes)	high
43	Clade A (D. torquata + D. australis + D. hebesa)	corroborated by 2 independent trees based on mtDNA and nDNA (4 nuclear genes)	high
44	Clade A + Clade B2 + Group C2 + Clade D + D. labialis + D. mitella	corroborated by MP mtDNA and nDNA (4 genes) trees, but ML and BI mtDNA trees contradict this result	medium
45	Delma (all species)	corroborated by 5 independent trees based on morphological characters, mtDNA, nDNA (1 nuclear gene), nDNA (4 nuclear genes), and nDNA (4,268 UCE loci)	high
